# Supplementary material
Source: Research Square preprint supplement (doi:10.21203/rs.3.rs-9970394/v1)
Supplement: Supplementary file 1 [file e8caa79dc3e04a2a487561f8.docx]

**Supplementary File**

**Article title:** From Variability to Precision: A Conceptual Framework, Methodological Considerations and Analytical Approaches in Personalised Resistance Training Prescription.

**Authors:** Antonio Dello Iacono1, Ivan Jukic2,3, Paul Swinton4

**Authors’ information:**

1Sport and Physical Activity Research Institute (SPARI), Division of Sport, Exercise and Health, School of Health and Life Sciences, University of the West of Scotland, United Kingdom.

2Department of Health, Sport, and Wellbeing, Faculty of Social and Applied Sciences, Abertay University, United Kingdom.

3Sport Performance Research Institute New Zealand (SPRINZ), Auckland University of Technology, Auckland, New Zealand.

4School of Health, Robert Gordon University, Aberdeen, United Kingdom.

**Corresponding author:** Antonio Dello Iacono, Phone: +44 7445454334, Email: antonio.delloiacono@uws.ac.uk

**Supplementary file introduction**

This supplementary file is a companion to the main paper. It provides a detailed treatment of the underlying variance-decomposition framework—including notation, mixed-effects specifications, identifiability conditions and worked examples from both real and simulated data.

**Latent delivered dose model; two treatments, up to two sessions per treatment**

￼￼￼ ￼￼￼ (typically sets, but could be another unit such as exercise bouts), and within ￼, there may be￼ (e.g., if￼ indexes s￼ indexes repetitions within the set).

*Latent delivered dose model*

Let denote the latent delivered dose (unobserved internal stimulus) for individual , treatment , session , unit , and within-unit . We model:

Terms and interpretation

- : latent delivered dose for individual , treatment , session , unit (e.g., set), and nested unit (e.g., repetition).
- : population intercept; expected delivered dose under the reference treatment at the reference covariate coding (e.g., after centring).
- : fixed treatment effect; systematic shift in expected dose attributable to treatment . With two treatments, it is common to set and interpret as the population mean contrast (comparator minus reference). Referred to in the main paper as Source 1 – Between-treatment effect.
- : vector of exposure features/covariates expressed at the lowest unit (indexed by , ; e.g., load, ROM, rest, velocity-loss target, set number, rep number; typically centred/scaled).
- : vector of population exposure–dose coefficients.
- : individual-specific random intercept; stable deviation of person ’s average dose level from the population mean (under reference coding). Referred to in the main paper as Source 2 – Between-subject dispersion.
- : vector of individual-specific random slopes; person-specific deviations in exposure–dose relationships.
- : individual-specific treatment contrast deviation (random treatment effect). This is the subject-by-treatment interaction on the dose scale: it represents how person ’s comparator–reference contrast differs from the population mean contrast. The treatment-contrast variance is . Under 0/1 coding, the person-specific treatment effect is . Referred to in the main paper as Source 3 – Subject-by-treatment interaction variance.
- : session-level random effect for person under treatment in session ; captures between-session/day-to-day deviations (test–retest variability) around that person’s treatment-specific mean. It is shared by all units within the same . Referred to in the main paper as Source 4 – Session-level (day-to-day) variability.
- : within-session random effect at the unit level (e.g., set-to-set); captures systematic deviations beyond the session effect that are shared across nested repetitions within unit . If desired, the variability in can be allowed to differ by treatment (e.g., ) to assess whether one programme produces more/less set-to-set variation. Referred to in the main paper as Source 5 – Within-session variability.
- : idiosyncratic residual at the lowest level; remaining stochastic variability not explained by the terms above (often interpreted as unmodelled process noise and/or measurement error at the level). Referred to in the main paper as Residual error.

*Correlation structure and why lower-level replication matters*

This indexing implies a nested correlation structure: observations share random effects depending on which indices match. Session-level correlation (): for two observations from the same person, treatment, and session, but potentially different units/reps, , and assuming are independent across units/lowest-level indices). Thus induces within-session correlation across all units in that session.

Unit-level correlation ():For two repetitions within the same unit (e.g., two reps within the same set), , because both observations share the same session effect and the same unit effect.

Lowest-level noise (): The term is typically assumed i.i.d. across ￼(conditional on the higher-level effects), so it contributes to the marginal variance of each observation but not to covariance across distinct .

*Why the lower level is required to distinguish from*

The set-level/unit-level component is only identifiable separately from the residual if there are multiple observations that share the same (i.e., if . When repetition-level data are available, is identified via the within-unit covariance across repeated (reps) within the same set/unit. If there were no lower-level (i.e., only a single summary value per unit ), then and would both enter as one additive within-session error at the same level. In that case, an i.i.d. specification for is not distinguishable from the residual: only the sum of their variances would be identified, and “set-level variance” could not be isolated without imposing additional structure (e.g., serial correlation across ).

In the worked examples in this supplementary file, we initially focus on models that do not include exposure features/covariates . All analyses and simulations are performed using R programming language for statistical computing and data visualization. We first outline how the different sources of variance described in the main paper (Sources 1–5) can be estimated using mixed-effects models. We present the corresponding model syntax for the lmer package in R and highlight the key technical issues that could not be covered in detail in the main text. We begin with models for estimating Sources 1–3, focusing on treatment effects, between-subject dispersion, and subject-by-treatment interaction variance, before extending the framework to designs that permit estimation of Source 4 (day-to-day/session-to-session variability). We also explain the design features and levels of replication required to distinguish these variance components from one another, and discuss important practical considerations such as treatment coding, identifiability, convergence, and singular fits.

**Fitting mixed-effects models (obtaining sources 1 to 3)**

**Model 1A: population effects only**

Y ~ treat

What it estimates:

- Average (fixed) difference between treatments (treat): referred to as Source 1 (Between treatment effect) in the main paper.
- Model does not account for pairing/repeated measures; standard errors will generally be incorrect because each participant contributes two correlated observations.

Note: In lmer, this model is typically inappropriate for crossover unless you use a method that accounts for repeated measures (e.g., a mixed model, a paired analysis, or cluster-robust standard errors).

**Model 1B: add stable between-subject differences**

Y ~ treat + (1 | ID)

What it estimates:

- Fixed effects of treat.
- : referred to as Source 2 (Between-subject dispersion) in the main paper. Stable between-person differences in the dose proxy (a person-specific level shift shared across both treatment observations; under 0/1 treatment coding, the fixed intercept corresponds to the mean under treat=0, but the random intercept is still a shared person effect across both sessions).
- is estimable here because each participant has repeated observations (two treatments), which allows separation of between-person variation from within-person residual variation.
- Accounts for clustering of repeated treatment observations within person.

This model implies 1 random effect per person and estimates two variance components: and . With just the crossover and no replicate, if we have a single dose value for each individual per session, this provides 2 observations which is plenty to estimate a single between-person variance component and the residual variance.

**Model 1C: between-subject dispersion and subject-by-treatment interaction (independent)**

Y ~ treat + (1 | ID) + (0 + treat | ID)

Assume treat coded numerically 0/1

What it estimates:

- Fixed effects of treat.
- : between-person variability in the expected outcome under the reference treatment () (in the presence of the random-slope term).
- : heterogeneity in the treatment contrast, i.e. between-person differences in around the population mean contrast. This is Source 3 (subject-by-treatment interaction variance) in the main paper.

Independence restriction and implied relationships:

The specification (1 | ID) + (0 + | ID) forces and to be independent, that is, an individual with a higher (or lower) stable dose level, does not systematically differ in their treatment contrast. In lme4, the shorthand is (1 + treat || ID) for “random intercept + random slope with zero correlation.”

Under 0/1 coding, the person-specific treatment 1 deviation is . Therefore, which based on our assumption gives . Likewise, , which implies the structural restriction and . If the true data-generating process implies (or more generally requires ), then this independence parameterisation is misspecified and can yield biased/misleading variance component estimates (often accompanied by convergence warnings or singular fits).

This model implies two random effects per person ( and ) and—under the enforced independence—estimates three variance components: , , and . With a single crossover and one observation per treatment per person (2 total observations), the model is formally identifiable, and in many settings will fit. However, with only one contrast per person, is weakly informed and can absorb occasion-specific deviations; singular (“boundary”) fits are therefore common in practice.

Coding note, factor vs numeric treatment coding:

If treat is coded not as numerical 0/1, but as a two-level factor with a reference level () and a comparator (), then Y ~ treat + (0 + treat | ID) fits a different parameterisation: two treatment-specific random intercepts per person, , and their covariance. From these we can derive an average offset and a contrast (e.g., and ). The treatment-specific between-subject variance components and correspond to Source 2 in the main paper and can be compared to assess differences in between-person dispersion across treatments. With a two-level factor, should generally not be fitted because already introduces a random effect for each treatment level, making redundant/over-parameterised (often resulting in singular fits).

**Model 1D: between-subject dispersion and subject-by-treatment interaction (correlated)**

Assume treat is coded as either (i) numeric 0/1, or (ii) a two-level factor with a consistent reference level (dummy coding). Under both, the model has the same *baseline + contrast* interpretation.

What it estimates

- Fixed effect of treat.
- : between-person variability in the expected outcome under the reference treatment ().
- Random slope variance : between-person variability in the treatment contrast, i.e. heterogeneity in around the population mean contrast (Source 3 in the main paper).
- Random intercept–slope covariance (and corresponding correlation): association between a person’s baseline level under and their person-specific treatment contrast. This allows, for example, individuals with higher baseline dose levels to systematically exhibit larger (or smaller) treatment contrasts.

Interpretation under common coding schemes:

0/1 coding (treat numeric 0/1): The random effects are naturally interpreted as where is the person-specific deviation under and is the person-specific deviation in the treatment contrast. The expected person-level deviation under is , so treatment-specific between-person dispersion is and

Thus, unlike Model 1C, this model does not impose ; the covariance term can be negative or positive.

Dummy coding with treat as a two-level factor and fitting yields the same *baseline + contrast* interpretation as 0/1 coding, provided the reference level is consistent (random intercept corresponds to the reference condition; random slope corresponds to the treatment contrast). The intercept–slope covariance corresponds to .

Effect coding (e.g., treat* coded for and for ): In , the random intercept represents the stable between-person deviation in the average level across treatments (because the intercept corresponds to the grand mean across ), while the random slope represents the person-specific deviation in the treatment contrast (difference between and ). This coding can yield a more interpretable decomposition when the “overall level” and the “contrast” are the key latent components of interest.

This model implies two random effects per person ( and ) and estimates three second-order parameters: , , and , plus the residual variance. With a single crossover and one observation per treatment per person (2 observations), the model is formally identifiable at the population level, but the intercept–slope covariance is weakly informed because each person contributes only one within-person contrast. In practice, REML/ML estimation in lmer frequently hits the boundary of the parameter space (e.g., near-perfect intercept–slope correlation and/or near-zero slope variance), producing singular fits or convergence failures. This reflects practical non-identifiability (insufficient information for stable estimation), rather than strict theoretical non-identifiability.

To obtain stable estimates of subject-specific treatment effects with the full random-effects covariance structure (including the intercept–slope covariance), we can (i) conduct more sessions (the minimal design extension is a single crossover replicate, so each participant completes two periods under each treatment), and/or (ii) collect multiple within-session dose values per participant and treatment (e.g., repeated sets). In practice, collecting multiple measurements within a session may appear less costly than doubling the number of sessions via crossover replication. However, when there is no crossover replication, the key limitation is that day-to-day/session variability () cannot be separated from stable subject-by-treatment differences, which can inflate the apparent subject-by-treatment interaction variance (contrast heterogeneity). To see this, let one person’s (non-replicated) contrast be . Suppressing covariates for clarity, consider where is the person-specific deviation under the reference treatment, is the person-specific deviation in the treatment contrast, is the session/day deviation for that person under treatment , and is remaining residual/measurement error. The observed contrast is then At the group level, If we assume independence and equal variances across treatments, a common simplification is
Thus, with a single crossover (no replicate), can be estimated well with participants, and within-session replication (e.g., multiple sets) can reduce noise in each session’s dose estimate. However, is not : it is inflated by day-to-day variability and residual noise because is inseparable from when each treatment is observed on only one occasion.

With a single crossover replicate (two sessions per treatment), each participant yields two contrasts, and , one from each period. Under the same decomposition,
Because is stable across periods while day-to-day and residual components change with , replication provides an identifying moment: . under the usual assumption that and are independent across periods. This is why replicated crossover designs allow (stable contrast heterogeneity) to be estimated without being driven by day-to-day variation, even if the model does not include an explicit day/session random effect.

Nevertheless, replication alone does not identify the day/session component . If there is only one observation per session (e.g., one set summary per session), then session-level variation and residual noise enter at the same observational level and are absorbed into the residual variance. To estimate separately from residual noise requires within-session replication (e.g., multiple sets), because is shared by all observations within the same session and induces within-session correlation.

Finally, once replication across sessions and within-session repeated sets are available, the remaining limitation is that set-to-set variability is at the same level as the residual unless there is an additional lower level of repetition. To distinguish set-to-set variation from idiosyncratic noise, one needs a finer-grained nested structure (e.g., multiple repetitions within each set), so that a set-level effect can be identified￼ and the intercept–slope covariance; within-session replication is required￼; and an additional lower level (rep-within-set) is required to isolate set-to-set variance from residual noise.

**Fitting mixed-effects models (estimating Sources 1–4)**

As discussed above, to estimate day-to-day/session-to-session variability —referred to as Source 4 in the main paper—and ultimately assess whether this variability differs across treatments, the design must provide replication at two levels: (i) crossover replication (at least two sessions per treatment per participant) and (ii) multiple within-session dose observations (e.g., multiple sets). The within-session replication is essential because is shared by all observations within the same session and is identified through the induced within-session correlation.

If only a single observation is available per session (e.g., one session summary with no repeated sets), then and the remaining observation-level noise enter at the same level and cannot be separated; in that case, is absorbed into the residual variance.

From a practical perspective, there are two related aims. First, there may be interest in quantifying the overall magnitude of day-to-day variability assuming it is common across treatments (a *marginal* day-variability component). Second, there may be interest in testing whether day-to-day variability differs by treatment (a *conditional*￼). We begin by extending the Sources 1–3 model to include a session-level random effect and estimate the marginal day-to-day variance component.

**Model 2A: Between-subject dispersion and subject-by-treatment interaction (correlated) combined with day-to-day variance.**

What it estimates

- as in Model 1D, this estimates Sources 1–3 (fixed treatment effect; between-subject dispersion; subject-by-treatment interaction variance) and the intercept–slope covariance
- In lme4, ID:treat:session is an interaction grouping factor. Each unique combination is treated as its own group; for example, person 1–treat=0–session=1 is one group and person 1–treat=0–session=2 is another, and so on. The model estimates a random deviation for each (person × treatment × session) occasion, and the corresponding variance component , which is Source 4 in the main paper.

*Interpretation and correlation structure*

The person-specific expected dose under treatment is , so the subject-specific treatment effect is . The session/day effect is shared by all sets within the same person × treatment × session. This induces within-session correlation: conditional on the person-level random effects and fixed effects. This sharing is what identifies : without multiple observations per session (e.g., multiple sets), cannot be separated from the residual and will be absorbed into .

**Model 2B: Between-subject dispersion and subject-by-treatment interaction (correlated) combined with treatment specific day-to-day variance.**

This model extends Model 2A by allowing the session/day variance to differ by treatment, i.e. . In frequentist software a common approach is to remain within lme4 and implement treatment-specific day variance via a parameterisation that estimates treatment-specific day variance via random slopes at the session level. In lme4, grouping factors cannot be partially missing (NA-masked) within a single model because rows with NA in any model variable are dropped. A practical alternative is to define a single occasion grouping factor for person-by-treatment-by-session, and then include two treatment indicator columns as random slopes at that occasion level. Here we define:

: a unique identifier for each person × treatment × session occasion (e.g., interaction(ID, treat, session)); and ref and comp: indicator variables taking values 0/1 for reference () and comparator () observations, respectively. We then fit

where || enforces zero correlation between the two occasion-level random effects (appropriate here because a given person × treatment × session contains observations under only one treatment).

What it estimates

- as in Model 1D, this estimates Sources 1–3 (fixed treatment effect; between-subject dispersion; subject-by-treatment interaction variance) and the intercept–slope covariance.
- estimates two distinct session/day variance components: , the day-to-day variance under the reference treatment (random effect for ref within ID_treat_sess); , the day-to-day variance under the comparator treatment (random effect for comp within ID_treat_sess).

This works because each occasion-level random effect is “active” only for the corresponding treatment rows (through ref and comp), allowing lmer to treat them as separate variance components without dropping data.

Comparing with Model 2A

Model 2A assumes a single common day-to-day variance component. Model 2B relaxes this by estimating and separately. A model comparison (e.g., likelihood ratio test using ML fits) can be used as an approximate test for treatment-specific day variance, although inference should be interpreted cautiously because variance components lie on the boundary of the parameter space (and singular fits can occur). Effect-size reporting (e.g., with uncertainty) is often preferable.

**Fitting mixed-effects models (estimating Sources 1–5)**

Progressing in the same manner, to estimate within-session unit-level variability—for example set-to-set variability , referred to as Source 5 in the main paper—and to assess whether this variability differs across treatments, the design must provide replication at three nested levels: (i) crossover replication: at least two sessions per treatment per participant (so stable contrast heterogeneity can be separated from session-specific fluctuations); (ii) within-session replication: multiple dose observations per session (e.g., multiple sets), which is required to identify session/day variability ; and (iii) within-set replication: multiple observations nested within each unit (e.g., multiple repetitions within each set). This lowest level is essential because is shared by all observations within the same set and is therefore identified through the within-set correlation it induces across repeated measurements.

**Model 3A: Between-subject dispersion and subject-by-treatment interaction (correlated) combined with day-to-day and within-set variance.**

What it estimates

- as in Model 1D, this estimates Sources 1–3 (fixed treatment effect; between-subject dispersion; subject-by-treatment interaction variance) and the intercept–slope covariance
- estimates a random deviation for each person × treatment × session, and the corresponding variance component , which is Source 4 in the main paper.
- estimates a random deviation for each person × treatment × session × set unit, and the corresponding variance component , which is Source 5 in the main paper.

Coding note (grouping factor interpretation). In lme4, ID:treat:session:set is an interaction grouping factor: each unique combination defines one group (e.g., person 1–treat=0–session=1–set=1 is one group; person 1–treat=0–session=1–set=2 is another).

*Interpretation and correlation structure*

The person-specific expected dose under treatment is (plus any covariate terms), so the subject-specific treatment effect is . The within-set effect is shared by all observations within the same set . Consequently, for two repetitions within the same set, conditional on the fixed effects and the person-level random effects. This “sharing” is what identifies : without replication within sets (e.g., multiple repetitions), cannot be separated from the residual term and is absorbed into .

**Model 3B: Between-subject dispersion and subject-by-treatment interaction (correlated) combined with day-to-day variance and treatment-specific within-set variance**

This model extends Model 3A by allowing within-set (set-level) variability to differ by treatment, i.e. , while retaining a session/day random effect to capture day-to-day variability.

In lme4, random-effect variances within a term are not directly modelled as functions of covariates. A common workaround is to define a single occasion grouping factor at the level where the random effect operates, and then include treatment indicator variables as random slopes at that level. This yields separate variance components for reference and comparator without requiring NA-masked grouping factors (which would cause lmer to drop rows). Here we define: ID_treat_sess: unique identifier for each person × treatment × session occasion (e.g., interaction(ID, treat, session)). ID_treat_sess_set: unique identifier for each person × treatment × session × set unit (e.g., interaction(ID, treat, session, set)). ref and comp: indicator variables taking values 0/1 for reference () and comparator () observations, respectively. We then fit:

where || enforces zero correlation between the two set-level random effects (appropriate because each set belongs to only one treatment).

What it estimates

- : as in Model 1D, estimates Sources 1–3 (fixed treatment effect; between-subject dispersion; subject-by-treatment interaction variance) and the intercept–slope covariance.
- : estimates the day-to-day/session variance (Source 4), assuming a common session/day variance across treatments (unless further extended as in Model 2B).
- : estimates two distinct within-session set-level variance components:, set-to-set variability under the reference treatment (random effect for ref within ID_treat_sess_set); , set-to-set variability under the comparator treatment (random effect for comp within ID_treat_sess_set).

This parameterisation works because each set-level random effect is “active” only for the corresponding treatment rows (through ref and comp), allowing lmer to estimate treatment-specific set-to-set variance components without dropping observations.

**Period/day effects**

Period/order effects are usually treated as nuisance shifts (learning, fatigue, adaptation, sequencing) rather than effects of intrinsic interest. Modelling these as random effects can be preferable, however with only four periods a fixed period effect is also defensible and often conventional.

**Simulation**

Simulation showing the above. Here we simulate jointly to encode treatment-specific between-subject dispersion and through their relationship heterogeneity in the treatment contrast. We simulate from a bivariate normal

Then, treatment-specific between-subject variances are and ; and the person-specific treatment contrast is . So, heterogeneity in “treatment response” (contrast heterogeneity) is: , such that it depends strongly on . If and , then (everyone shifts similarly). If , then . If , can be large even when each condition’s variance is moderate.

Additionally, (1+treat∣ID) will estimate the correlation between and and we have Hence

**Code script**

library(MASS)

library(lme4)

library(dplyr)

library(glmmTMB)

library(tidyverse)

########################### Simulating data #################################

# --- Parameters ---

n <- 1000 # people

S <- 2 # sessions per treatment per person

Sets <- 2 # sets per session

Reps <- 6 # repetitions per set

mu <- 100

tau <- 10 # fixed mean shift for treat=1

sigma0 <- 20 # between-subject SD in treatment 0

sigma1 <- 10 # between-subject SD in treatment 1

rho <- 0.9 # corr(a_i0, a_i1)

# Var(c_i)=σ_1^2+σ_0^2-2ρσ_0 σ_1

# sd ci

sqrt(sigma1^2 + sigma0^2 - 2*rho*sigma1*sigma0)

sd_day <- 7.5 # session/day SD: u_its

sd_set <- 3 # set-to-set SD: w_itsk

sd_meas <- 5 # measurement noise SD: eps_itskr

set.seed(123)

# --- Simulate (a_i0, a_i1) jointly ---

Sigma <- matrix(c(

sigma0^2, rho*sigma0*sigma1,

rho*sigma0*sigma1, sigma1^2

), nrow = 2, byrow = TRUE)

A <- MASS::mvrnorm(n = n, mu = c(0, 0), Sigma = Sigma)

a_i0 <- A[,1]

a_i1 <- A[,2]

# --- Build long data: ID x treat x session x set x rep ---

dat <- expand.grid(

ID = 1:n,

treat = c(0, 1),

session = 1:S,

set = 1:Sets,

rep = 1:Reps

)

dat <- dat[order(dat$ID, dat$treat, dat$session, dat$set, dat$rep), ]

# Attach person-level treatment-specific offsets a_it

dat$a_it <- ifelse(dat$treat == 0, a_i0[dat$ID], a_i1[dat$ID])

# --- Create grouping keys for hierarchical random effects ---

key_day <- with(dat, paste(ID, treat, session, sep = "_"))

key_set <- with(dat, paste(ID, treat, session, set, sep = "_"))

# --- Draw u_its once per (ID,treat,session) ---

u_vals <- rnorm(length(unique(key_day)), mean = 0, sd = sd_day)

names(u_vals) <- unique(key_day)

dat$u_its <- u_vals[key_day]

# --- Draw w_itsk once per (ID,treat,session,set) ---

w_vals <- rnorm(length(unique(key_set)), mean = 0, sd = sd_set)

names(w_vals) <- unique(key_set)

dat$w_itsk <- w_vals[key_set]

# --- Measurement noise at the rep level ---

dat$eps_itskr <- rnorm(nrow(dat), mean = 0, sd = sd_meas)

# --- Latent dose (no measurement noise) and observed outcome ---

dat$D <- mu + tau*dat$treat + dat$a_it + dat$u_its + dat$w_itsk

dat$Y <- dat$D + dat$eps_itskr

# Convenience factors

dat$treat_f <- factor(ifelse(dat$treat==0,"ref","comp"), levels = c("ref","comp"))

dat$ID_f <- factor(dat$ID)

# Create a unique "occasion within person×treatment" factor for day-to-day variance

# (so you can model u_its separately from residual)

dat$ID_treat_session <- interaction(dat$ID_f, dat$treat_f, dat$session)

############ Fitting mixed-effects models (obtaining sources 1 to 3) ############

# Single Session Set data

SSSdat <- dat %>%

filter(session==1,set==1,rep==1)

# Replicate Session Single Set data

RSSdat <- dat %>%

filter(set==1,rep==1)

# Replicate Single Repetition

RSRdat <- dat %>%

filter(rep==1)

# Single session multiple set

SSRdat <- dat %>%

filter(session==1,rep==1)

# Single set/rep analysis

#### Model 1A

m1a <- lm(Y~treat, data=SSSdat)

summary(m1a)

#### Model 1B

m1b <- lmer(Y~treat + (1|ID),data=SSSdat)

# Var(bi) = Cov(ai0,ai1) = ρσ_0σ_1

rho*sigma0*sigma1

as.data.frame(VarCorr(m1b))

#### Model 1C

# singular without replicate crossover or multiple set

lmer(Y~treat + (1 | ID) + (0 + treat | ID),data=SSSdat)

# Fitted on replicate crossover

# data violate var(a_i1)>= var(a_i0)

m1c <- lmer(Y~treat + (1 | ID) + (0 + treat | ID),data=RSSdat)

as.data.frame(VarCorr(m1c))

# Model 1Ca

# will not fit without replicate crossover or multiple set

lmer(Y~treat_f + (0 + treat_f | ID),data=SSSdat)

# Fitted on replicate crossover (replication prevents systematic overestimation)

m1ca <-lmer(Y~treat_f + (0 + treat_f | ID),data=RSSdat)

as.data.frame(VarCorr(m1ca))

# var(ci) = σ_0^2+σ_1^2-2ρσ_0σ_1,

sigma0^2+sigma1^2 - 2*rho*sigma0*sigma1

# Fitted without replicate crossover but multiple repetitions (inflate contrast)

m1cb <-lmer(Y~treat_f + (0 + treat_f | ID),data=SSRdat)

as.data.frame(VarCorr(m1cb))

# Model 1D

# will not fit without replicate crossover or multiple set

lmer(Y~treat + (1 + treat | ID),data=SSSdat)

# Fitted on replicate crossover (replication prevents systematic overestimation)

m1d <- lmer(Y~treat + (1 + treat | ID),data=RSSdat)

as.data.frame(VarCorr(m1d))

# Fitted without replicate crossover but multiple repetitions (inflate contrast)

m1da <-lmer(Y~treat + (1 + treat | ID),data=SSRdat)

as.data.frame(VarCorr(m1da))

############ Fitting mixed-effects models (obtaining sources 1 to 4) ############

m2a <-lmer(Y~treat + (1 + treat | ID) + (1 | ID:treat:session),data=RSRdat)

as.data.frame(VarCorr(m2a))

# Create two session-level grouping factors—one for ref sessions and

# one for comp sessions—and include both random effects:

RSRdat <- RSRdat %>%

mutate(

ID_f = factor(ID),

ID_treat_sess = interaction(ID_f, treat, session, drop = TRUE), # person×treatment×session occasion

ref = as.numeric(treat == 0),

comp = as.numeric(treat == 1)

)

m2b <- lmer(Y ~ treat + (1 + treat | ID_f) +(0 + ref + comp || ID_treat_sess),

data = RSRdat

)

as.data.frame(VarCorr(m2b))

# Compare models

m2a_ml <- update(m2a, REML = FALSE)

m2b_ml <- update(m2b, REML = FALSE)

anova(m2a_ml, m2b_ml)

# Quick check, add additional session variance to treat = 0, rnorm(0,4^2)

set.seed(123)

RSRdat <- RSRdat %>%

group_by(ID_treat_sess) %>%

mutate(

bump_ref = if_else(first(treat) == 0, rnorm(1, 0, 4), 0)

) %>%

ungroup() %>%

mutate(

Y_new = Y + bump_ref

)

m2a_new <-lmer(Y_new~treat + (1 + treat | ID) + (1 | ID:treat:session),data=RSRdat)

as.data.frame(VarCorr(m2a_new))

m2b_new <- lmer(Y_new ~ treat + (1 + treat | ID_f) +(0 + ref + comp || ID_treat_sess),

data = RSRdat

)

as.data.frame(VarCorr(m2b_new))

# Compare models

m2a_new_ml <- update(m2a_new, REML = FALSE)

m2b_new_ml <- update(m2b_new, REML = FALSE)

anova(m2a_new_ml, m2b_new_ml)

m2b_tmb_disp <- glmmTMB(

Y ~ treat + (1 + treat | ID_f) + (0 + ref + comp || ID_treat_sess),

dispformula = ~ 0 + treat_f, # treatment-specific residual SD

data = RSRdat,

family = gaussian()

)

VarCorr(m2b_tmb_disp)

############ Fitting mixed-effects models (obtaining sources 1 to 5) ############

m3a <-lmer(Y~treat + (1 + treat | ID) + (1 | ID:treat:session) + (1 | ID:treat:session:set),data=dat)

as.data.frame(VarCorr(m3a))

# Create two set-level grouping factors—one for ref sessions and

# one for comp sessions—and include both random effects:

dat <- dat %>%

mutate(

ID_f = factor(ID),

ID_treat_sess = interaction(ID_f, treat, session, drop = TRUE),

ID_treat_sess_set = interaction(ID_f, treat, session, set, drop = TRUE),

ref = as.numeric(treat == 0),

comp = as.numeric(treat == 1)

)

m3b <- lmer(

Y ~ treat + (1 + treat | ID_f) +

(1 | ID_treat_sess) +

(0 + ref + comp || ID_treat_sess_set),

data = dat

)

as.data.frame(VarCorr(m3b))

**Worked examples**

We now provide a fully worked example, where we first explain the difference between treatment and exposure covariates and some of the modelling implications. In this appendix, we separate treatment from the predictor vector because they play different roles in defining (i) the causal contrast of interest and (ii) how variability in delivered dose is partitioned across levels of the design. Treatment denotes the assigned method or programme, which is typically a randomised factor in an acute crossover design, about which we seek a causal contrast. Examples include comparing blood-flow restriction vs no restriction, traditional sets vs intra-set rest-redistribution, or an autoregulated velocity-loss termination rule vs a pre-prescribed prescription. In these cases, indexes which method was applied, and the corresponding fixed effect targets the between-method shift in expected dose (i.e., the average treatment effect on the dose scale).

By contrast, denotes a vector of exposure descriptors that characterise how the work is performed at the chosen unit of analysis (e.g., set-level or repetition-level). These include structural features (e.g., set number, exercise indicator, session order), prescribed elements (e.g., load, planned rest), and realised features (e.g., repetitions completed, time under tension, velocity loss, range of motion). In other words, while specifies the programme, describes the realised or structured exposure within that programme and provides the basis for modelling systematic within-session and within-person variation in dose.

This distinction matters because a variable can legitimately appear as either a treatment or an exposure covariate depending on the research question and the design. If the study manipulates a single feature with two levels (e.g., low vs high rep range), that feature may be treated as and the causal contrast is defined directly between its levels. Alternatively, if repetitions vary within a condition because of fatigue, compliance, or stopping rules, repetitions are more naturally treated as part of , describing within-condition exposure rather than defining the primary causal contrast.

A particularly important implication is that some components of may be post-assignment and therefore lie on the pathway by which the treatment operates. For example, in an autoregulated versus pre-prescribed comparison, differences in repetitions completed, time under tension, or velocity loss are often intended consequences of the programme. Treating such variables as covariates in the outcome model does not “deconfound” the treatment effect; rather, it changes the estimand from the total programme effect to a controlled/direct effect (e.g., the effect of programme holding repetitions fixed). This is sometimes of interest, but it answers a different question and should be interpreted as a standardised or volume-controlled contrast rather than the real-world effect of implementing the programmes as written.

Accordingly, throughout the appendix we use (and, where relevant, subject-by-treatment variation) to represent systematic between-method differences in delivered dose, while captures predictable variation associated with the structured or realised exposure at the relevant level (exercise, set, repetition). Where mechanistic reasoning suggests that the exposure–dose mapping differs by method (e.g., fatigue trajectories across sets differ under autoregulation), we include treatment-by-exposure interactions to represent method-specific exposure–dose relationships, while keeping clear whether the goal is to estimate total effects or controlled contrasts.

**Worked example with covariates**

In this tutorial example we consider a reference and comparator resistance-training programme evaluated in a randomised crossover with replication. Each participant completes both programmes across multiple sessions (days), allowing us to quantify not only the average difference between programmes but also how consistently each programme delivers the intended dose across people and across repeated sessions and units within each session.

Each resistance-training session comprises three exercises, which we index by and treat as a unit of analysis for systematic baseline differences across movements. Within each exercise, participants perform three sets, indexed by . We denote participants by , treatments/programmes by , and sessions by . The reference programme is coded (reference), and the comparator programme is coded (comparator). Thus, the full indexing for an observation is : a given set of exercise , performed by participant , in session , under programme .

The outcome for analysis is a set-level delivered dose. For each set we compute a single scalar dose value, , using a constructed metric intended to reflect the internal stimulus delivered to the muscle. In this example the metric is assumed to integrate key elements such as the amount of musculature activated, average force, and time under tension. Conceptually, is treated as a proxy for an unobserved internal delivered dose . However, because dose is computed once per set, it is natural to model directly as the outcome and interpret the set-level residual variation as a combination of true set-to-set fluctuation and measurement/computation noise in the dose proxy. That is, if we wanted to separate set-level residual variation we would require replication of the dose at the level below (e.g. across repetitions).

This design implies a clear hierarchy of variability that the multilevel model is built to partition. First, there are stable between-person differences: some participants tend to experience higher or lower dose values overall, and this variation may or may not be different across treatments. Second, because the design is replicated across days, there is within-person day-to-day variability: the same person under the same programme may produce a higher or lower dose on different sessions due to readiness, fatigue carryover, or other session-level influences. Third, within a given session there can be exercise-to-exercise deviations beyond the systematic average differences across the three exercises (even after including an exercise baseline term), reflecting session-specific differences in how each movement is executed. Finally, within each exercise there is set-to-set variability across the three sets, plus any remaining noise in the dose proxy. The purpose of the multilevel delivered-dose model introduced next is to estimate the mean programme contrast while decomposing variability across precisely these levels.

**Step 1: Design-adjusted mean model (establish the average programme contrast)**
We begin by modelling the expected (mean) set-level dose while accounting for the key design features that induce systematic structure in the outcome. Specifically, we estimate the average difference between the reference and comparator programmes while adjusting for baseline differences across exercises and for the expected pattern across sets (e.g., fatigue or accumulation effects). At this stage we focus only on the fixed (population-average) component of the model and defer random effects until the next steps.

Formally, we specify the design-adjusted mean model as

where is the population intercept, is the fixed treatment effect (the population-average programme contrast on the dose scale), represents exercise-specific baseline shifts (treated as nuisance adjustment for systematic differences across the three exercises), and captures the average set-number pattern across the three sets (modelled either as an ordered effect or as a categorical set factor). The residual term captures unexplained set-level variability at this initial stage.

The primary quantity of interest in Step 1 is , the mean treatment effect on delivered dose. Establishing this design-adjusted mean structure is important because it anchors subsequent variance decomposition: by absorbing predictable differences due to exercise and set number, we avoid inflating later variance components with structure that is systematic and not central to questions of consistency or heterogeneity.

**Step 2: Add between-person dispersion and treatment-contrast heterogeneity**

Having established the design-adjusted mean structure, we next introduce the person-level random effects needed to quantify (i) stable differences in overall dose between individuals and (ii) heterogeneity in the programme contrast. At this stage the model becomes

where is a person-specific random intercept capturing stable deviation in average dose level (under the chosen coding), and is a person-specific random treatment effect capturing how the comparator–reference contrast differs across individuals. Under 0/1 treatment coding, the person-specific programme effect is .

This step answers two distinct questions. First, we quantify between-person dispersion in overall dose level, which is indexed by . This component reflects how much individuals differ in their typical set-level dose after accounting for systematic exercise differences and the average set-number pattern. Second, we assess heterogeneity in the programme contrast, indexed by . This is the variance of the subject-by-treatment interaction on the dose scale: it captures whether the dose difference between autoregulated and pre-prescribed programmes is broadly similar across participants or whether it varies meaningfully between individuals.

Interpretation follows directly. If is small relative to the other sources of variability, the programme contrast is largely consistent across participants (i.e., most individuals experience a similar shift in dose between programmes). If is sizeable, then individuals differ meaningfully in the magnitude (and potentially direction) of their programme contrast, motivating later steps aimed at explaining this heterogeneity.

If a central substantive goal is to compare between-person dispersion under each programme—for example because a desirable programme is one that delivers a more uniform dose across individuals—then it is helpful to move from a single random intercept to treatment-specific person effects. A convenient way to express this is to let each participant have one latent “baseline dose level” under the reference programme and another under the comparator programme. With 0/1 coding for treatment, the model can be written as

where is participant ’s deviation from the population mean under the reference programme (), and is the corresponding deviation under the comparator programme (). The key feature of this extension is that the between-person variances are allowed to differ by programme, such that Optionally, a covariance can be added to reflect a likely relationship that individuals who tend to have higher dose under one programme also tend to have higher dose under the other. This treatment-specific dispersion is conceptually distinct from heterogeneity in the within-person programme contrast. In the present parameterisation, the person-specific contrast is and so the variance of the contrast is

Step 3: Assess programme-specific stability

After establishing the average programme contrast and quantifying between-person dispersion and contrast heterogeneity, we next examine whether the pattern of dose across sets differs between programmes. Set number typically captures a predictable fatigue or accumulation structure within an exercise (e.g., dose tends to decline from set 1 to set 3). To test this, we extend the mean structure to include a treatment-by-set interaction:

Here represents the baseline set-number effect under the reference programme, and the interaction captures how that set-number pattern changes under the comparator programme. In practice, with three sets, is often specified as a categorical factor (set 1/2/3) to avoid imposing linearity, although a centred linear trend is also possible when a simple monotonic pattern is expected.

The parameters of interest in this step are the coefficients associated with . These quantify whether the programme difference in dose is constant across sets or varies with set number. Substantively, this allows questions as to whether the comparator flatten the decline in delivered dose across sets, or does it primarily affect later sets (e.g., a larger programme contrast at set 3 than at set 1), consistent with differential fatigue management.

It is important to note that this step is not the same as the heterogeneity assessment in Step 2. Step 2 addresses whether individuals differ in their average programme contrast (i.e., subject-specific deviations in the overall comparator–reference difference). Step 3 instead addresses whether the programme contrast itself is structured within the session.

**Step 4: Potential exploration of contrast heterogeneity**

If Step 2 indicates that the subject-by-treatment interaction variance is non-trivial, then a natural next step is to test whether part of this heterogeneity is systematic and explainable. A common candidate moderator in resistance training is baseline strength. If we let denote baseline strength for participant , centred (e.g., mean-centred or standardised), we can extend the fixed-effects component of the model to include both a main effect of strength and, crucially, a strength-by-treatment interaction:

The main effect captures how baseline strength relates to overall dose level (averaged across treatments under the chosen coding), whereas the interaction coefficient addresses the moderation question. Under 0/1 treatment coding, the conditional treatment effect becomes plus any remaining individual-specific deviation captured by .

The quantities of interest in this step are the interaction coefficient and the extent to which the estimated treatment-contrast heterogeneity decreases once this systematic moderation is included. Operationally, this is assessed by examining the change in when moving from the model without to the model with it.

**Step 5: compare day-to-day variability across treatments**

With the replicated crossover design, it creates repeated observations of the same person under the same programme across multiple sessions. However, replication alone is not sufficient to identify a distinct day-to-day variance component: we also require multiple observations within each session (here, multiple sets across exercises) so that a session-specific deviation can be distinguished from set-level residual noise. With set-level data, all sets performed by participant under treatment in session share the same session context (e.g., readiness, residual fatigue, sleep, stress), which induces correlation among the set-level dose values within that session. This shared correlation is what allows day-to-day variability to be estimated explicitly rather than being absorbed into the residual variance.

To capture day-to-day fluctuations, we add a session-level random effect for each person within each treatment:

In practice, treatment-specific session variance can be implemented by defining an occasion-level grouping factor for each unique person × treatment × session combination (e.g., interaction(ID, treat, session)) and then estimating separate random-effect variances for the reference and comparator sessions via treatment indicator columns. This parameterisation yields direct estimates of and within a single mixed model, without requiring separate fits by treatment. We can the estimate for example if providing evidence that the comparator provides a more stable dose across days.

**Step 6: Residual variance as set-to-set inconsistency**

With a single dose value computed per set, the remaining set-level term represents unexplained set-level variability:

The target in this step is therefore the treatment-specific residual variances and , which summarise how much variation remains at the set level after accounting for the mean structure and higher-level random effects.

A key caveat is that, with set-level outcomes, is a composite: it includes true set-to-set fluctuations and any measurement/computation noise in the set-dose proxy. Without additional within-set replication (e.g., repetition-level indicators), these components cannot be separated. As such, should be interpreted as unexplained set-level variability, not a purified estimate of “true” set-to-set variance.

Interpretation is therefore cautious. If reliability of the dose proxy and measurement/computation noise are broadly similar across treatments, then differences in can be suggestive of differences in set-to-set consistency. However, if relevant structural features are omitted that differ systematically between programmes and result in misspecification, they can inflate the residual variance in one treatment and obscure or exaggerate true differences.

**Analysis for the main paper**

We conclude this supplementary file with the R code scripts for the single and replicate crossover analyses presented in the main paper. The code is fully commented to highlight important aspects of the analyses.

**Code script single crossover**

# =========================================================

# Single-crossover trial:

# Comparing intra-set rest redistribution (IRR) vs traditional sets (TRA)

# Outcomes:

# - Average delivered dose (session mean velocity)

# - Dose consistency / set-to-set variability

#

# Treatment coding used throughout:

# TRA = 0 (reference)

# IRR = 1 (comparator)

# Therefore:

# fixed effect for treatment_num = IRR - TRA

# =========================================================

# -----------------------------

# 1. Load packages

# -----------------------------

library(dplyr)

library(tidyr)

library(forcats)

library(ggplot2)

library(lmerTest)

library(glmmTMB)

# -----------------------------

# 2. Helper functions

# -----------------------------

# Wald-style estimate and 95% CI for a single fixed-effect coefficient

wald_ci_fixed <- function(fit, term) {

est <- fixef(fit)[term]

se <- sqrt(diag(vcov(fit)))[term]

tibble(

term = term,

estimate = unname(est),

se = unname(se),

conf.low = unname(est - 1.96 * se),

conf.high = unname(est + 1.96 * se)

)

}

# For models fitted to log(SD), exponentiate the treatment coefficient

# to obtain the ratio of SDs: SD_IRR / SD_TRA

extract_sd_ratio <- function(fit, term = "treatment_num") {

out <- wald_ci_fixed(fit, term)

out %>%

transmute(

term = term,

ratio_sd = exp(estimate),

conf.low = exp(conf.low),

conf.high = exp(conf.high)

)

}

# Extract treatment-specific set-level SDs from the lmer model:

# (0 + ref + comp || id_treat_set)

# where:

# ref = TRA indicator

# comp = IRR indicator

# Robust extractor for treatment-specific set-level SDs

extract_set_sd_contrast <- function(fit) {

vc_df <- as.data.frame(VarCorr(fit))

# Keep only the set-level random-effect rows

set_df <- vc_df %>%

filter(

grepl("^id_treat_set", grp),

is.na(var2), # keep variance terms, not covariances

var1 %in% c("ref", "comp")

)

sd_TRA <- set_df$sdcor[match("ref", set_df$var1)]

sd_IRR <- set_df$sdcor[match("comp", set_df$var1)]

c(

sd_TRA = sd_TRA,

sd_IRR = sd_IRR,

diff_IRR_minus_TRA = sd_IRR - sd_TRA,

ratio_IRR_over_TRA = sd_IRR / sd_TRA

)

}

# Parametric bootstrap for treatment-specific set-level SDs and contrasts

bootstrap_set_sd_contrast <- function(fit, nsim = 1000, seed = 1, use.u = TRUE) {

set.seed(seed)

b <- bootMer(

fit,

FUN = extract_set_sd_contrast,

nsim = nsim,

type = "parametric",

use.u = use.u

)

point <- extract_set_sd_contrast(fit)

ci <- t(apply(

b$t,

2,

quantile,

probs = c(0.025, 0.975),

na.rm = TRUE

))

list(

point = point,

ci = ci,

boot_object = b

)

}

# Simple formatter for manuscript/table output

fmt_est_ci <- function(est, lo, hi, digits = 2) {

sprintf(

paste0("%.", digits, "f (%.", digits, "f to %.", digits, "f)"),

est, lo, hi

)

}

# -----------------------------

# 3. Load and prepare raw data

# -----------------------------

sc_raw <- read.csv("single_RCT.csv") %>%

mutate(

id = factor(id),

# Ensure treatment labels are ordered with TRA as the reference

treatment_label = fct_relevel(factor(treatment), "TRA", "IRR"),

# Numeric treatment coding used for fixed effects:

# treatment_num = 0 for TRA, 1 for IRR

treatment_num = if_else(treatment_label == "IRR", 1, 0),

set = as.integer(set),

repetition = as.integer(repetition)

)

# =========================================================

# QUESTION 1

# Which training method yields a greater average delivered dose

# when implemented across many individuals?

#

# Estimand used in Table 1:

# session-average velocity across all repetitions

# (rep-weighted because it is computed directly from all reps)

# =========================================================

# -----------------------------

# 4. Session-average velocity

# -----------------------------

sc_session_mean <- sc_raw %>%

group_by(id, treatment_num, treatment_label) %>%

summarise(

session_mean = mean(velocity, na.rm = TRUE),

n_reps = n(),

.groups = "drop"

)

# Mixed model for the mean treatment contrast

# Random intercept for id accounts for the paired/crossover structure

fit_q1_session_mean <- lmer(

session_mean ~ treatment_num + (1 | id),

data = sc_session_mean,

REML = TRUE

)

summary(fit_q1_session_mean)

# IRR - TRA estimate and 95% CI

q1_session_mean_res <- wald_ci_fixed(fit_q1_session_mean, "treatment_num")

q1_session_mean_res

# Example manuscript-ready string

fmt_est_ci(

est = q1_session_mean_res$estimate,

lo = q1_session_mean_res$conf.low,

hi = q1_session_mean_res$conf.high,

digits = 2

)

# =========================================================

# QUESTION 3

# Which training method yields a more consistent delivered dose

# across many individuals?

#

# First approach:

# compute SD of set-average velocity within each participant x treatment

# and model log(set_sd)

# =========================================================

# -----------------------------

# 5. Create set-level means

# -----------------------------

# One row per participant x treatment x set

sc_set_mean <- sc_raw %>%

group_by(id, treatment_num, treatment_label, set) %>%

summarise(

set_mean_velocity = mean(velocity, na.rm = TRUE),

n_reps = n(), # TRA sets expected ~8 reps; IRR sets expected ~4 reps

.groups = "drop"

)

# -----------------------------

# 6. Plot set means (Figure-style exploratory plot)

# -----------------------------

# Order participants by their overall mean velocity across all reps

sc_id_order <- sc_raw %>%

group_by(id) %>%

summarise(

id_mean_velocity = mean(velocity, na.rm = TRUE),

.groups = "drop"

) %>%

arrange(desc(id_mean_velocity)) %>%

mutate(id_order = factor(id, levels = id)) %>%

select(id, id_order, id_mean_velocity)

# Join ordering back to set-level data

sc_plot_dat <- sc_set_mean %>%

left_join(sc_id_order, by = "id") %>%

mutate(

treatment_label = fct_relevel(treatment_label, "TRA", "IRR"),

set = as.integer(set)

)

# Treatment-specific average of the set means

sc_treatment_means <- sc_plot_dat %>%

group_by(treatment_label) %>%

summarise(

mean_set_velocity = mean(set_mean_velocity, na.rm = TRUE),

.groups = "drop"

)

ggplot(sc_plot_dat, aes(x = id_order, y = set_mean_velocity)) +

geom_point(aes(shape = factor(set)), size = 2.5) +

geom_hline(

data = sc_treatment_means %>% filter(treatment_label == "TRA"),

aes(yintercept = mean_set_velocity),

linetype = "dashed",

colour = "blue",

linewidth = 0.8

) +

geom_hline(

data = sc_treatment_means %>% filter(treatment_label == "IRR"),

aes(yintercept = mean_set_velocity),

linetype = "dashed",

colour = "red",

linewidth = 0.8

) +

facet_wrap(~ treatment_label, ncol = 2, scales = "free_x") +

scale_y_continuous(breaks = seq(0.3, 0.8, 0.1)) +

labs(

x = NULL,

y = expression(paste("Set-average mean velocity (", m %.% s^{-1}, ")")),

shape = "Set"

) +

theme_classic() +

theme(

text = element_text(family = "Times New Roman"),

axis.text = element_text(size = 14),

axis.title = element_text(size = 16),

axis.text.x = element_blank(),

axis.ticks.x = element_blank(),

legend.title = element_text(size = 14),

legend.text = element_text(size = 13),

strip.text = element_text(size = 13),

legend.position = "bottom"

) +

guides(shape = guide_legend(nrow = 1, byrow = TRUE))

# -----------------------------

# 7. Set-to-set variability:

# all available sets

# -----------------------------

# Compute within-session SD of set means for each participant x treatment

sc_set_sd_all <- sc_set_mean %>%

group_by(id, treatment_num, treatment_label) %>%

summarise(

set_sd = sd(set_mean_velocity, na.rm = TRUE),

n_sets = n(),

.groups = "drop"

)

# Model log(SD) with random intercept for participant

# Because the outcome is log(set_sd), exponentiating the treatment coefficient

# gives the ratio of SDs: SD_IRR / SD_TRA

fit_q3_logsd_all <- lmer(

log(set_sd) ~ treatment_num + (1 | id),

data = sc_set_sd_all,

REML = TRUE

)

summary(fit_q3_logsd_all)

q3_logsd_all_res <- extract_sd_ratio(fit_q3_logsd_all, "treatment_num")

q3_logsd_all_res

fmt_est_ci(

est = q3_logsd_all_res$ratio_sd,

lo = q3_logsd_all_res$conf.low,

hi = q3_logsd_all_res$conf.high,

digits = 1

)

# -----------------------------

# 8. Set-to-set variability:

# restricted to sets 1-3

# -----------------------------

# Restrict to the set positions shared by both protocols

sc_set_sd_13 <- sc_set_mean %>%

filter(set %in% 1:3) %>%

group_by(id, treatment_num, treatment_label) %>%

summarise(

set_sd = sd(set_mean_velocity, na.rm = TRUE),

n_sets = n(),

.groups = "drop"

)

fit_q3_logsd_13 <- lmer(

log(set_sd) ~ treatment_num + (1 | id),

data = sc_set_sd_13,

REML = TRUE

)

summary(fit_q3_logsd_13)

q3_logsd_13_res <- extract_sd_ratio(fit_q3_logsd_13, "treatment_num")

q3_logsd_13_res

fmt_est_ci(

est = q3_logsd_13_res$ratio_sd,

lo = q3_logsd_13_res$conf.low,

hi = q3_logsd_13_res$conf.high,

digits = 1

)

# =========================================================

# Optional supplementary analysis:

# Heteroscedastic set-level models using glmmTMB

#

# Important interpretation note:

# With only one observation per participant x treatment x set,

# a set-level random effect is not identifiable on the set-mean scale.

# Therefore, these models estimate treatment-specific residual spread

# of set means, not a distinct between-set variance component.

# =========================================================

# -----------------------------

# 9. Heteroscedastic models on set means

# -----------------------------

# All sets, no fixed effect for set number

fit_het_all <- glmmTMB(

set_mean_velocity ~ treatment_label + (1 | id),

dispformula = ~ 0 + treatment_label,

family = gaussian(),

data = sc_set_mean

)

summary(fit_het_all)

# For Gaussian models, exponentiating the dispersion coefficients

# gives treatment-specific residual SD parameters on the natural scale

exp(fixef(fit_het_all)$disp)

# All sets, adjusting for set number

fit_het_all_setadj <- glmmTMB(

set_mean_velocity ~ treatment_label + factor(set) + (1 | id),

dispformula = ~ 0 + treatment_label,

family = gaussian(),

data = sc_set_mean

)

summary(fit_het_all_setadj)

exp(fixef(fit_het_all_setadj)$disp)

# Restrict to sets 1-3

sc_set_mean_13 <- sc_set_mean %>%

filter(set %in% 1:3)

fit_het_13 <- glmmTMB(

set_mean_velocity ~ treatment_label + (1 | id),

dispformula = ~ 0 + treatment_label,

family = gaussian(),

data = sc_set_mean_13

)

summary(fit_het_13)

exp(fixef(fit_het_13)$disp)

# Restrict to sets 1-3 and adjust for set number

fit_het_13_setadj <- glmmTMB(

set_mean_velocity ~ treatment_label + factor(set) + (1 | id),

dispformula = ~ 0 + treatment_label,

family = gaussian(),

data = sc_set_mean_13

)

summary(fit_het_13_setadj)

exp(fixef(fit_het_13_setadj)$disp)

# =========================================================

# Repetition-level models

#

# Repetition-level data provide replication within each set,

# which makes a set-level variance component identifiable.

#

# Key point:

# In a single crossover, there is only one session per participant x treatment.

# Therefore, the participant x treatment random effect captures a blend of:

# - stable person-specific treatment differences, and

# - occasion/session-specific deviations

# These cannot be separated in this design.

# =========================================================

# -----------------------------

# 10. Construct repetition-level analysis data

# -----------------------------

sc_rep <- sc_raw %>%

mutate(

id_f = factor(id),

# One treatment occasion per participant in this single-crossover design

id_treat = interaction(id_f, treatment_label, drop = TRUE),

# Set nested within participant x treatment

# This level has multiple repetitions per set, so a set-level random effect is identifiable

id_treat_set = interaction(id_f, treatment_label, set, drop = TRUE),

# Treatment-specific indicator variables used to estimate separate set-level SDs

# ref = TRA

# comp = IRR

ref = as.numeric(treatment_label == "TRA"),

comp = as.numeric(treatment_label == "IRR"),

# Optional structural covariates

rep_in_set = as.integer(repetition),

set_f = factor(set)

)

# -----------------------------

# 11. Repetition-level model:

# all sets, no adjustment for set number

# -----------------------------

# Random effects:

# (1 | id_f) = stable between-person differences

# (1 | id_treat) = person x treatment occasion deviations

# (0 + ref + comp || id_treat_set)

# = treatment-specific set-level variance components

#

# The final term allows the set-level SD to differ under TRA and IRR.

fit_q3_rep_all <- lmer(

velocity ~ treatment_num +

(1 | id_f) +

(1 | id_treat) +

(0 + ref + comp || id_treat_set),

data = sc_rep,

REML = TRUE

)

summary(fit_q3_rep_all)

VarCorr(fit_q3_rep_all)

# Bootstrap uncertainty for treatment-specific set SDs and their contrast

boot_q3_rep_all <- bootstrap_set_sd_contrast(

fit = fit_q3_rep_all,

nsim = 1000,

seed = 1,

use.u = TRUE

)

boot_q3_rep_all$point

boot_q3_rep_all$ci

# Table 1 reports the absolute difference in set-level SD:

# IRR - TRA

fmt_est_ci(

est = boot_q3_rep_all$point["diff_IRR_minus_TRA"],

lo = boot_q3_rep_all$ci["diff_IRR_minus_TRA", 1],

hi = boot_q3_rep_all$ci["diff_IRR_minus_TRA", 2],

digits = 2

)

# -----------------------------

# 12. Repetition-level model:

# sets 1-3 only

# -----------------------------

sc_rep_13 <- sc_rep %>%

filter(set %in% 1:3)

fit_q3_rep_13 <- lmer(

velocity ~ treatment_num +

(1 | id_f) +

(1 | id_treat) +

(0 + ref + comp || id_treat_set),

data = sc_rep_13,

REML = TRUE

)

summary(fit_q3_rep_13)

VarCorr(fit_q3_rep_13)

boot_q3_rep_13 <- bootstrap_set_sd_contrast(

fit = fit_q3_rep_13,

nsim = 1000,

seed = 1,

use.u = TRUE

)

boot_q3_rep_13$point

boot_q3_rep_13$ci

fmt_est_ci(

est = boot_q3_rep_13$point["diff_IRR_minus_TRA"],

lo = boot_q3_rep_13$ci["diff_IRR_minus_TRA", 1],

hi = boot_q3_rep_13$ci["diff_IRR_minus_TRA", 2],

digits = 2

)

# -----------------------------

# 13. Repetition-level model:

# all sets, adjusting for set number

# -----------------------------

fit_q3_rep_all_setadj <- lmer(

velocity ~ treatment_num + set_f +

(1 | id_f) +

(1 | id_treat) +

(0 + ref + comp || id_treat_set),

data = sc_rep,

REML = TRUE

)

summary(fit_q3_rep_all_setadj)

VarCorr(fit_q3_rep_all_setadj)

boot_q3_rep_all_setadj <- bootstrap_set_sd_contrast(

fit = fit_q3_rep_all_setadj,

nsim = 1000,

seed = 1,

use.u = TRUE

)

boot_q3_rep_all_setadj$point

boot_q3_rep_all_setadj$ci

fmt_est_ci(

est = boot_q3_rep_all_setadj$point["diff_IRR_minus_TRA"],

lo = boot_q3_rep_all_setadj$ci["diff_IRR_minus_TRA", 1],

hi = boot_q3_rep_all_setadj$ci["diff_IRR_minus_TRA", 2],

digits = 2

)

# -----------------------------

# 14. Optional model to adjust for both set number and repetition position

# -----------------------------

fit_q3_rep_all_setrepadj <- lmer(

velocity ~ treatment_num + set_f + rep_in_set +

(1 | id_f) +

(1 | id_treat) +

(0 + ref + comp || id_treat_set),

data = sc_rep,

REML = TRUE

)

summary(fit_q3_rep_all_setrepadj)

VarCorr(fit_q3_rep_all_setrepadj)

boot_q3_rep_all_setrepadj <- bootstrap_set_sd_contrast(

fit = fit_q3_rep_all_setrepadj,

nsim = 1000,

seed = 1,

use.u = TRUE

)

boot_q3_rep_all_setrepadj$point

boot_q3_rep_all_setrepadj$ci

**Code script replicate crossover**

# =========================================================

# Replicate-crossover trial:

# Comparing IRR3 vs IRR4 using set-average relative impulse

#

# Aims in this section:

# 1. Visualise the raw set-level data

# 2. Mimic a single-crossover analysis using session 1 only

# 3. Fit the full replicate-crossover model across both sessions

# 4. Bootstrap variance components for Table 2

# 5. Derive and plot athlete-specific treatment contrasts

# using raw session contrasts and BLUPs

#

# Treatment coding used throughout:

# IRR3 = 0 (reference)

# IRR4 = 1 (comparator)

# Therefore:

# fixed effect for treatment_num = IRR4 - IRR3

# =========================================================

# -----------------------------

# 1. Load packages

# -----------------------------

library(dplyr)

library(tidyr)

library(forcats)

library(ggplot2)

library(lmerTest)

# -----------------------------

# 2. Helper functions

# -----------------------------

# Extract the standard deviation of variance components from an lmer model

# using the VarCorr() data frame representation.

#

# This is robust to model naming and returns SDs (not variances),

# which is the scale reported in Table 2.

extract_sd_components_single <- function(fit) {

vc_df <- as.data.frame(VarCorr(fit))

# Random effects for participant (between-subject dispersion and contrast variability)

id_rows <- vc_df %>%

filter(grp == "id_f", is.na(var2))

sd_intercept <- id_rows$sdcor[match("(Intercept)", id_rows$var1)]

sd_treatment <- id_rows$sdcor[match("treatment_num", id_rows$var1)]

c(

sd_between_subject = sd_intercept,

sd_contrast = sd_treatment,

sd_residual = sigma(fit)

)

}

extract_sd_components_replicate <- function(fit) {

vc_df <- as.data.frame(VarCorr(fit))

# Participant-level random effects

id_rows <- vc_df %>%

filter(grp == "id_f", is.na(var2))

# Session-within-participant-by-treatment random effect

day_rows <- vc_df %>%

filter(grp == "id_treat_session", is.na(var2))

sd_intercept <- id_rows$sdcor[match("(Intercept)", id_rows$var1)]

sd_treatment <- id_rows$sdcor[match("treatment_num", id_rows$var1)]

sd_day <- day_rows$sdcor[1]

c(

sd_between_subject = sd_intercept,

sd_contrast = sd_treatment,

sd_day_to_day = sd_day,

sd_residual = sigma(fit)

)

}

# Parametric bootstrap wrapper for variance components

bootstrap_sd_components <- function(fit, extractor, nsim = 1000, seed = 1) {

set.seed(seed)

b <- bootMer(

fit,

FUN = extractor,

nsim = nsim,

type = "parametric",

use.u = FALSE

)

point <- extractor(fit)

ci <- t(apply(

b$t,

2,

quantile,

probs = c(0.025, 0.975),

na.rm = TRUE

))

list(

point = point,

ci = ci,

boot_object = b

)

}

# Convert bootstrap output into a simple results data frame

format_sd_results <- function(boot_obj) {

data.frame(

component = names(boot_obj$point),

estimate = unname(boot_obj$point),

lower_95 = boot_obj$ci[, 1],

upper_95 = boot_obj$ci[, 2],

row.names = NULL

)

}

# Formatter for manuscript/table text

fmt_est_ci <- function(est, lo, hi, digits = 2) {

sprintf(

paste0("%.", digits, "f (%.", digits, "f to %.", digits, "f)"),

est, lo, hi

)

}

# -----------------------------

# 3. Load and prepare raw data

# -----------------------------

rc_raw <- read.csv("replicate_RCT.csv") %>%

mutate(

id = factor(id),

# Ensure IRR3 is the reference treatment

treatment_label = fct_relevel(factor(treatment), "IRR3", "IRR4"),

# Numeric treatment coding used in the models:

# 0 = IRR3, 1 = IRR4

treatment_num = if_else(treatment_label == "IRR4", 1, 0),

session = as.integer(session),

set = as.integer(set)

)

# Quick data check

rc_raw %>%

count(id, treatment_label, session, name = "n_reps") %>%

arrange(id, treatment_label, session)

# =========================================================

# 4. Create set-level analysis data

#

# The outcome used in Table 2 is mean relative impulse per set.

# This yields multiple set observations within each participant x treatment x session.

# =========================================================

rc_set_mean <- rc_raw %>%

group_by(id, treatment_num, treatment_label, session, set) %>%

summarise(

set_mean_impulse = mean(impulse, na.rm = TRUE),

n_reps = n(),

.groups = "drop"

) %>%

mutate(

id_f = factor(id),

set_f = factor(set),

# Participant x treatment grouping factor

id_treat = interaction(id_f, treatment_label, drop = TRUE),

# Participant x treatment x session grouping factor

id_treat_session = interaction(id_f, treatment_label, session, drop = TRUE)

)

# =========================================================

# 5. Visualise the raw set-level data (Figure 4 style)

#

# The aim is to show:

# - all set means,

# - both sessions for each athlete,

# - treatment-specific panels,

# - overall mean horizontal reference lines.

#

# To make visual comparison easier:

# - athletes are ranked separately within each treatment

# - session 1 and session 2 are placed next to each other for each athlete

# =========================================================

# Rank athletes within each treatment based on their average set mean

rc_id_order <- rc_set_mean %>%

group_by(treatment_label, id) %>%

summarise(

id_mean_impulse = mean(set_mean_impulse, na.rm = TRUE),

.groups = "drop"

) %>%

group_by(treatment_label) %>%

arrange(desc(id_mean_impulse), .by_group = TRUE) %>%

mutate(id_rank = row_number()) %>%

ungroup()

# Join ordering back to set-level data

# Create x-positions so the two sessions for each athlete sit side by side:

# session 1 -> 2*rank - 1

# session 2 -> 2*rank

rc_plot_dat <- rc_set_mean %>%

left_join(rc_id_order, by = c("treatment_label", "id")) %>%

mutate(

x = 2 * id_rank + (session - 2)

)

# Treatment-specific mean line for the figure

rc_plot_means <- rc_plot_dat %>%

group_by(treatment_label) %>%

summarise(

mean_set_impulse = mean(set_mean_impulse, na.rm = TRUE),

.groups = "drop"

)

# Vertical separators between athlete pairs

rc_vline_between_pairs <- rc_id_order %>%

transmute(

treatment_label,

xintercept = 2 * id_rank + 0.5

)

# Optional subset of sets for plotting clarity

# Here keeping even-numbered sets, as in the draft

rc_plot_dat_sub <- rc_plot_dat %>%

filter(set %in% c(2, 4, 6, 8))

ggplot(rc_plot_dat_sub, aes(x = x, y = set_mean_impulse)) +

geom_vline(

data = rc_vline_between_pairs,

aes(xintercept = xintercept),

linetype = "dashed",

colour = "grey75",

linewidth = 0.3

) +

geom_point(aes(shape = factor(set)), size = 2) +

geom_hline(

data = rc_plot_means %>% filter(treatment_label == "IRR3"),

aes(yintercept = mean_set_impulse),

linetype = "dashed",

colour = "blue",

linewidth = 0.8

) +

geom_hline(

data = rc_plot_means %>% filter(treatment_label == "IRR4"),

aes(yintercept = mean_set_impulse),

linetype = "dashed",

colour = "red",

linewidth = 0.8

) +

facet_wrap(~ treatment_label, ncol = 2, scales = "free_x") +

scale_shape_manual(

values = c("2" = 16, "4" = 17, "6" = 15, "8" = 3),

labels = c("Set 2", "Set 4", "Set 6", "Set 8")

) +

labs(

x = "",

y = expression(paste("Set-average relative impulse (", N %.% s %.% kg^{-1}, ")")),

shape = "Set"

) +

theme_classic() +

theme(

axis.text.x = element_blank(),

axis.ticks.x = element_blank(),

legend.position = "bottom"

) +

guides(shape = guide_legend(nrow = 1, byrow = TRUE))

# =========================================================

# 6. Pseudo single-crossover analysis

#

# To illustrate what would be learned from a single crossover only,

# we retain one exposure to each treatment per athlete.

#

# Here session 1 is used to mimic the single-crossover case.

#

# Model:

# set_mean_impulse ~ treatment_num + (1 + treatment_num | id_f)

#

# Interpretation:

# random intercept SD = between-subject dispersion

# random slope SD = contrast heterogeneity

# residual SD = within-person variation not decomposed further

#

# Because there is only one session per treatment here, day-to-day/session

# variability cannot be separated from stable contrast heterogeneity.

# =========================================================

rc_set_mean_day1 <- rc_set_mean %>%

filter(session == 1)

fit_rc_single <- lmer(

set_mean_impulse ~ treatment_num +

(1 + treatment_num | id_f),

data = rc_set_mean_day1,

REML = TRUE

)

summary(fit_rc_single)

VarCorr(fit_rc_single)

# Bootstrap SD-based variance components for Table 2

boot_rc_single <- bootstrap_sd_components(

fit = fit_rc_single,

extractor = extract_sd_components_single,

nsim = 1000,

seed = 1

)

boot_rc_single$point

boot_rc_single$ci

rc_single_results <- format_sd_results(boot_rc_single)

rc_single_results

# Example table strings

fmt_est_ci(

est = rc_single_results$estimate[rc_single_results$component == "sd_between_subject"],

lo = rc_single_results$lower_95[rc_single_results$component == "sd_between_subject"],

hi = rc_single_results$upper_95[rc_single_results$component == "sd_between_subject"],

digits = 2

)

fmt_est_ci(

est = rc_single_results$estimate[rc_single_results$component == "sd_contrast"],

lo = rc_single_results$lower_95[rc_single_results$component == "sd_contrast"],

hi = rc_single_results$upper_95[rc_single_results$component == "sd_contrast"],

digits = 2

)

fmt_est_ci(

est = rc_single_results$estimate[rc_single_results$component == "sd_residual"],

lo = rc_single_results$lower_95[rc_single_results$component == "sd_residual"],

hi = rc_single_results$upper_95[rc_single_results$component == "sd_residual"],

digits = 2

)

# =========================================================

# 7. Full replicate-crossover analysis

#

# Model:

# set_mean_impulse ~ treatment_num +

# (1 + treatment_num | id_f) +

# (1 | id_treat_session)

#

# Interpretation:

# (1 + treatment_num | id_f)

# = stable between-subject differences and stable contrast heterogeneity

# (1 | id_treat_session)

# = day-to-day / session-to-session variability within person x treatment

#

# This model separates stable contrast heterogeneity from session-specific noise.

# =========================================================

fit_rc_replicate <- lmer(

set_mean_impulse ~ treatment_num +

(1 + treatment_num | id_f) +

(1 | id_treat_session),

data = rc_set_mean,

REML = TRUE

)

summary(fit_rc_replicate)

VarCorr(fit_rc_replicate)

# Bootstrap SD-based variance components for Table 2

boot_rc_replicate <- bootstrap_sd_components(

fit = fit_rc_replicate,

extractor = extract_sd_components_replicate,

nsim = 1000,

seed = 1

)

boot_rc_replicate$point

boot_rc_replicate$ci

rc_replicate_results <- format_sd_results(boot_rc_replicate)

rc_replicate_results

# Example table strings

fmt_est_ci(

est = rc_replicate_results$estimate[rc_replicate_results$component == "sd_between_subject"],

lo = rc_replicate_results$lower_95[rc_replicate_results$component == "sd_between_subject"],

hi = rc_replicate_results$upper_95[rc_replicate_results$component == "sd_between_subject"],

digits = 2

)

fmt_est_ci(

est = rc_replicate_results$estimate[rc_replicate_results$component == "sd_contrast"],

lo = rc_replicate_results$lower_95[rc_replicate_results$component == "sd_contrast"],

hi = rc_replicate_results$upper_95[rc_replicate_results$component == "sd_contrast"],

digits = 2

)

fmt_est_ci(

est = rc_replicate_results$estimate[rc_replicate_results$component == "sd_day_to_day"],

lo = rc_replicate_results$lower_95[rc_replicate_results$component == "sd_day_to_day"],

hi = rc_replicate_results$upper_95[rc_replicate_results$component == "sd_day_to_day"],

digits = 2

)

fmt_est_ci(

est = rc_replicate_results$estimate[rc_replicate_results$component == "sd_residual"],

lo = rc_replicate_results$lower_95[rc_replicate_results$component == "sd_residual"],

hi = rc_replicate_results$upper_95[rc_replicate_results$component == "sd_residual"],

digits = 2

)

# =========================================================

# 8. Athlete-specific contrasts from the replicate model

#

# The population-average fixed effect for treatment_num is IRR4 - IRR3.

# The participant-specific random slope modifies this for each athlete.

#

# BLUP-based athlete-specific contrast:

# delta_i = beta_treatment + b_i,treatment

#

# These are shrinkage estimates:

# - they combine information from both sessions,

# - they adjust for day-to-day variability via the full model,

# - they are more stable than raw single-session contrasts.

# =========================================================

# Extract participant-level random effects

re_id <- ranef(fit_rc_replicate)$id_f

# Population-average treatment contrast

beta_treatment <- fixef(fit_rc_replicate)[["treatment_num"]]

# Athlete-specific BLUP treatment contrasts

blup_contrast <- tibble(

id = rownames(re_id),

delta_blup = as.numeric(beta_treatment + re_id[, "treatment_num"])

) %>%

arrange(desc(delta_blup))

blup_contrast

# =========================================================

# 9. Raw day-specific contrasts

#

# For comparison with the BLUPs, calculate direct contrasts from each session:

# delta_session = mean(IRR4 set_mean_impulse) - mean(IRR3 set_mean_impulse)

#

# This gives one observed contrast per athlete per session.

# =========================================================

delta_by_session <- rc_set_mean %>%

group_by(id, session, treatment_label) %>%

summarise(

mean_session_impulse = mean(set_mean_impulse, na.rm = TRUE),

.groups = "drop"

) %>%

mutate(treatment_label = as.character(treatment_label)) %>%

pivot_wider(

names_from = treatment_label,

values_from = mean_session_impulse

) %>%

mutate(

delta = .data[["IRR4"]] - .data[["IRR3"]]

) %>%

select(id, session, delta)

# Put session 1 and session 2 contrasts on the same row

delta_wide <- delta_by_session %>%

pivot_wider(

names_from = session,

values_from = delta,

names_prefix = "delta_session"

)

delta_wide

# =========================================================

# 10. Combine BLUPs and raw contrasts for plotting (Figure 5 style)

#

# The plot shows, for each athlete:

# - session 1 raw contrast

# - BLUP using both sessions

# - session 2 raw contrast

#

# Athletes are ranked by BLUP contrast to show the model-based ordering.

# =========================================================

delta_all <- delta_wide %>%

mutate(id = as.character(id)) %>%

left_join(blup_contrast, by = "id") %>%

arrange(desc(delta_blup)) %>%

mutate(id_rank = row_number())

# Long format for plotting

rc_contrast_plot_dat <- delta_all %>%

select(id, id_rank, delta_session1, delta_blup, delta_session2) %>%

pivot_longer(

cols = c(delta_session1, delta_blup, delta_session2),

names_to = "contrast_type",

values_to = "delta"

) %>%

mutate(

contrast_type = factor(

contrast_type,

levels = c("delta_session1", "delta_blup", "delta_session2"),

labels = c("Session 1", "BLUP (both sessions)", "Session 2")

),

x = id_rank

)

# Vertical line segment spanning the minimum to maximum contrast for each athlete

rc_line_dat <- rc_contrast_plot_dat %>%

group_by(id, id_rank) %>%

summarise(

y_min = min(delta, na.rm = TRUE),

y_max = max(delta, na.rm = TRUE),

.groups = "drop"

)

# Vertical separators between athletes

rc_vline_between_ids <- delta_all %>%

transmute(xintercept = id_rank + 0.5)

ggplot(rc_contrast_plot_dat, aes(x = x, y = delta)) +

geom_vline(

data = rc_vline_between_ids,

aes(xintercept = xintercept),

linetype = "dashed",

colour = "grey75",

linewidth = 0.5

) +

geom_segment(

data = rc_line_dat,

aes(x = id_rank, xend = id_rank, y = y_min, yend = y_max),

alpha = 0.35

) +

geom_point(aes(shape = contrast_type), size = 2.2) +

geom_hline(yintercept = 0) +

labs(

x = "",

y = expression(atop(

"Set-average within-person contrast",

paste("(relative impulse ", N %.% s %.% kg^{-1}, ", IRR4 - IRR3)")

)),

shape = ""

) +

theme_classic() +

theme(

axis.text.x = element_blank(),

axis.ticks.x = element_blank(),

legend.position = "bottom"

) +

guides(shape = guide_legend(nrow = 1, byrow = TRUE))
